# Supplementary material
Source: PubMed Central journal article supplement (PMC7008086)
Supplement: NIHMS1545206-supplement-1.pdf [file NIHMS1545206-supplement-1.pdf]

# Association of plasma soluble ST2 and galectin-3 with cardiovascular events and mortality following cardiac surgery

*(sST2 and gal-3 associate with post-op mortality)*

Dipal M. Patel, Heather Thiessen-Philbrook, Jeremiah R. Brown, Eric McArthur, Dennis G. Moledina, Sherry G. Mansour, Michael G. Shlipak, Jay L. Koyner, Peter Kavsak, Richard P. Whitlock, Allen D. Everett, David J. Malenka, Amit X. Garg, Steven G. Coca, and Chirag R. Parikh

## Contents

|                                                                                                                 |    |
|-----------------------------------------------------------------------------------------------------------------|----|
| Supplemental Figure 1 a-b. Patient selection.....                                                               | 2  |
| Supplemental Table 1. Characteristics of assays used for sST2 and gal-3 quantification.....                     | 3  |
| Supplemental Table 2 a. Characteristics of patient cohorts by pre-operative sST2. ....                          | 4  |
| Supplemental Table 2 b. Characteristics of patient cohorts by pre-operative gal-3.....                          | 6  |
| Supplemental Table 3a. Events included in the primary composite outcome.....                                    | 8  |
| Supplemental Table 3b. Hazard ratios for components of the primary outcome. ....                                | 8  |
| Supplemental Figure 2 a-b Biomarker trends for pre and post-operative sST2 and Gal-3 .....                      | 9  |
| Supplemental Table 4. Hazard ratios for the primary outcome after adjustment for NT-proBNP and troponin T. .... | 10 |
| Supplemental Table 5. Interaction values of the primary composite outcome with incidence of CHF. ....           | 11 |
| Supplemental Table 6. Interaction values of the primary composite outcome with incidence of AKI. ....           | 12 |

### Supplemental Figure 1 a-b. Patient selection.

#### a) TRIBE-AKI

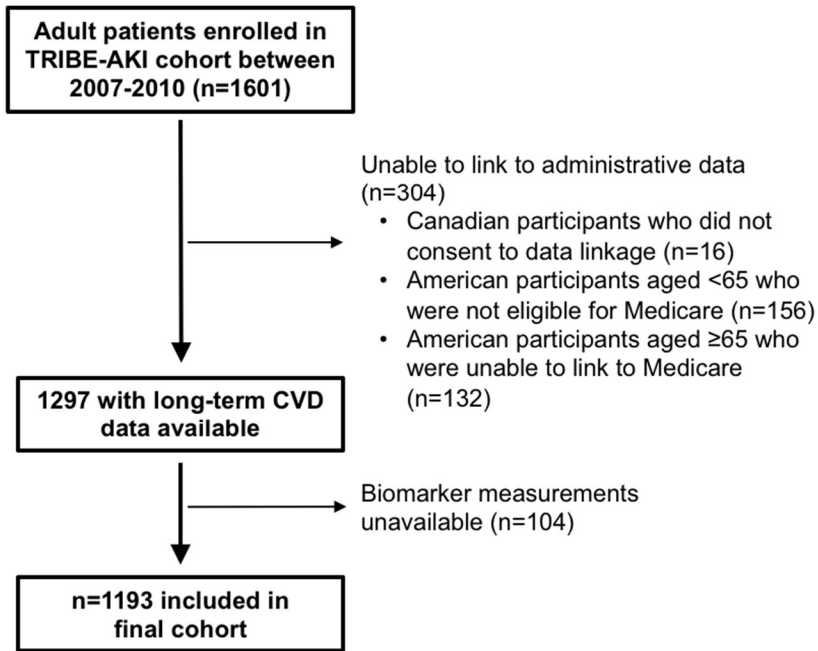

#### b) NNE

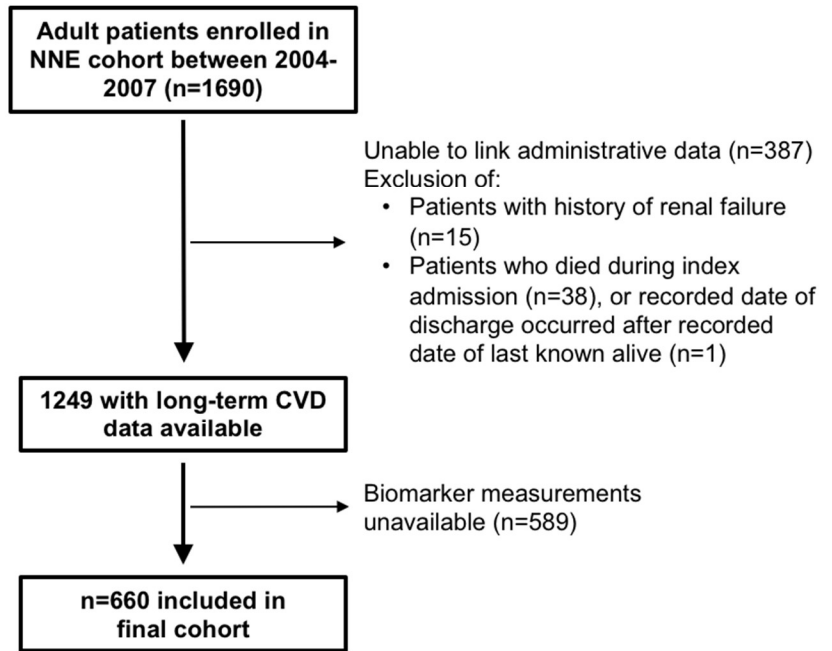

Supplemental Figure 1 a-b. Flow diagram of patient selection process for (a) TRIBE-AKI and (b) NNE cohorts.

**Supplemental Table 1. Characteristics of assays used for sST2 and gal-3 quantification.**

| Assay characteristics                          |              | sST2 (n=40)        | gal-3 (n=38)        |
|------------------------------------------------|--------------|--------------------|---------------------|
| <b>Meso Scale range of detection</b>           |              | 0.69 to 8300 pg/ml | 2951 to 28790 pg/ml |
| <b>Correlation coefficient (r)<sup>a</sup></b> |              | 0.98               | 0.78 <sup>b</sup>   |
| <b>Coefficient of variation (CV)</b>           |              | 16.63%             | 15.76%              |
| <b>Linearity of Dilution (% recovery)</b>      | 2-fold       | 103%               | 105%                |
|                                                | 4-fold       | 101%               | 113%                |
|                                                | 8-fold       | 104%               | 104%                |
|                                                | 16-fold      | 95%                | 94%                 |
| <b>Spike Recovery (% recovery)</b>             | Low spike    | 95%                | 92%                 |
|                                                | Medium spike | 105%               | 92%                 |
|                                                | High spike   | 96%                | 87%                 |

**Supplemental Table 1. Characteristics of assays used for sST2 and gal-3 quantification.** <sup>a</sup>Correlation coefficients are provided in comparison to biomarker levels obtained using FDA-approved assays. <sup>b</sup>Two samples were excluded from this calculation due to handling issues.

**Supplemental Table 2 a. Characteristics of patient cohorts by pre-operative sST2.**

| Patient characteristics                               | Pre-operative sST2 (TRIBE-AKI) |            |            |            |         | Pre-operative sST2 (NNE) |            |            |            |         |
|-------------------------------------------------------|--------------------------------|------------|------------|------------|---------|--------------------------|------------|------------|------------|---------|
|                                                       | All (N=1193)                   | T1 (n=397) | T2 (n=398) | T3 (n=398) | p-value | All (N=660)              | T1 (n=212) | T2 (n=234) | T3 (n=214) | p-value |
| Age at surgery (SD)                                   | 73 (8.4)                       | 73 (8.6)   | 73 (8.4)   | 73 (8.4)   | 0.6     | 71 (7.9)                 | 71 (8.1)   | 72 (6.8)   | 71 (8.8)   | 0.17    |
| Male                                                  | 837 (70%)                      | 250 (63%)  | 281 (71%)  | 306 (77%)  | <0.001  | 501 (76%)                | 145 (68%)  | 180 (77%)  | 176 (82%)  | 0.003   |
| <b>Pre-operative comorbidities</b>                    |                                |            |            |            |         |                          |            |            |            |         |
| Diabetes                                              | 444 (37%)                      | 123 (31%)  | 161 (40%)  | 160 (40%)  | 0.007   | 273 (41%)                | 74 (35%)   | 91 (39%)   | 108 (50%)  | 0.003   |
| Hypertension                                          | 955 (80%)                      | 308 (78%)  | 325 (82%)  | 322 (81%)  | 0.3     | 555 (84%)                | 173 (82%)  | 204 (87%)  | 178 (84%)  | 0.3     |
| Myocardial infarction                                 | 302 (26%)                      | 97 (25%)   | 103 (26%)  | 102 (26%)  | 0.9     | 309 (47%)                | 77 (36%)   | 109 (47%)  | 123 (57%)  | <0.001  |
| Congestive heart failure                              | 244 (20%)                      | 78 (20%)   | 65 (16%)   | 101 (25%)  | 0.006   | 86 (13%)                 | 16 (8%)    | 26 (11%)   | 44 (21%)   | <0.001  |
| <b>Pre-operative renal function</b>                   |                                |            |            |            |         |                          |            |            |            |         |
| Serum creatinine                                      | 1.1 (0.3)                      | 1.0 (0.3)  | 1.1 (0.3)  | 1.1 (0.4)  | 0.003   | 1.2 (0.7)                | 1.1 (0.3)  | 1.1 (0.4)  | 1.4 (1.2)  | <0.001  |
| eGFR (ml/min per 1.73 m <sup>2</sup> )                |                                |            |            |            |         |                          |            |            |            |         |
| ≥ 90                                                  | 129 (11%)                      | 38 (10%)   | 48 (12%)   | 43 (11%)   |         | 95 (14%)                 | 34 (16%)   | 31 (13%)   | 30 (14%)   |         |
| 60-90                                                 | 661 (55%)                      | 235 (59%)  | 220 (55%)  | 206 (52%)  | 0.07    | 358 (54%)                | 126 (59%)  | 130 (56%)  | 102 (48%)  | 0.004   |
| ≤ 60                                                  | 403 (34%)                      | 124 (31%)  | 130 (33%)  | 149 (37%)  |         | 207 (31%)                | 52 (25%)   | 73 (31%)   | 82 (38%)   |         |
| <b>Characteristics of surgery and hospitalization</b> |                                |            |            |            |         |                          |            |            |            |         |
| Elective surgery                                      | 1023 (86%)                     | 341 (86%)  | 347 (87%)  | 335 (84%)  | 0.5     | 183 (28%)                | 60 (28%)   | 69 (29%)   | 54 (25%)   | 0.6     |
| CABG with valve repair                                | 285 (24%)                      | 91 (23%)   | 91 (23%)   | 104 (26%)  | 0.5     | 34 (5%)                  | **         | **         | **         | **      |
| CABG                                                  | 575 (48%)                      | 186 (47%)  | 209 (52%)  | 180 (45%)  |         | 577 (93%)                | 183 (93%)  | 219 (95%)  | 117 (93%)  |         |
| Valve                                                 | 332 (28%)                      | 121 (30%)  | 99 (25%)   | 112 (28%)  |         | **                       | **         | **         | **         | **      |

| Patient characteristics             | Pre-operative sST2 (TRIBE-AKI) |               |               |               |         | Pre-operative sST2 (NNE) |               |               |               |         |
|-------------------------------------|--------------------------------|---------------|---------------|---------------|---------|--------------------------|---------------|---------------|---------------|---------|
|                                     | All (N=1193)                   | T1 (n=397)    | T2 (n=398)    | T3 (n=398)    | p-value | All (N=660)              | T1 (n=212)    | T2 (n=234)    | T3 (n=214)    | p-value |
| On-Pump                             | 1075 (90%)                     | 355 (89%)     | 356 (89%)     | 364 (91%)     | 0.48    | 585 (89%)                | 189 (89%)     | 223 (95%)     | 173 (80%)     | 0.54    |
| Perfusion time (min)                | 104 (80, 140) <sup>a</sup>     | 102 (77, 133) | 100 (79, 140) | 111 (87, 144) | 0.004   | 104 (87, 122)            | 100 (81, 116) | 105 (90, 122) | 107 (91, 130) | 0.006   |
| Days hospitalized                   | 6 (5, 9)                       | 6 (5, 8)      | 6 (5, 8)      | 7 (5, 9)      | <0.001  | 8 (6, 12)                | 8 (6, 11)     | 8 (6, 12)     | 10 (7, 14)    | 0.02    |
| Acute Kidney Injury                 | 420 (35%)                      | 114 (29%)     | 137 (34%)     | 169 (42%)     | <.001   | 273 (41%)                | 62 (29%)      | 97(41%)       | 114 (53%)     | 0.006   |
| <b>Post-operative complications</b> |                                |               |               |               |         |                          |               |               |               |         |
| Stroke                              | 7 (1%)                         | 3 (1%)        | 2 (1%)        | 2 (1%)        | 0.87    | **                       | **            | **            | **            | **      |
| Re-operation                        | 57 (5%)                        | 16 (4%)       | 17 (4%)       | 24 (6%)       | 0.35    | 26 (4%)                  | **            | **            | **            | **      |
| Prolonged Ventilation               | 39 (3%)                        | 7 (2%)        | 7 (2%)        | 25 (6%)       | <.001   | 38 (6%)                  | **            | 12 (2%)       | 16 (2%)       | **      |
| DSWI                                | 9 (1%)                         | 4 (1%)        | 4 (1%)        | 1 (0%)        | 0.36    | **                       | **            | **            | **            | **      |

**Supplemental Table 2 b. Characteristics of patient cohorts by pre-operative gal-3.**

| Patient characteristics                               | Pre-operative gal-3 (TRIBE-AKI) |            |            |            |         | Pre-operative gal-3 (NNE) |            |            |            |         |
|-------------------------------------------------------|---------------------------------|------------|------------|------------|---------|---------------------------|------------|------------|------------|---------|
|                                                       | All (N=1193)                    | T1 (n=397) | T2 (n=398) | T3 (n=398) | p-value | All (N=660)               | T1 (n=220) | T2 (n=230) | T3 (n=210) | p-value |
| Age at surgery (SD)                                   | 73 (8.4)                        | 73 (8.7)   | 73 (8.7)   | 74 (7.8)   | 0.08    | 71 (7.9)                  | 70 (7.6)   | 71 (7.6)   | 72 (8.5)   | 0.04    |
| Male                                                  | 837 (70%)                       | 302 (76%)  | 286 (72%)  | 249 (63%)  | <0.001  | 501 (76%)                 | 179 (81%)  | 176 (77%)  | 146 (70%)  | 0.02    |
| <b>Pre-operative comorbidities</b>                    |                                 |            |            |            |         |                           |            |            |            |         |
| Diabetes                                              | 444 (37%)                       | 143 (36%)  | 152 (38%)  | 149 (37%)  | 0.8     | 273 (41%)                 | 83 (38%)   | 92 (40%)   | 98 (47%)   | 0.2     |
| Hypertension                                          | 955 (80%)                       | 307 (77%)  | 317 (80%)  | 331 (83%)  | 0.1     | 555 (84%)                 | 181 (82%)  | 195 (85%)  | 179 (85%)  | 0.6     |
| Myocardial infarction                                 | 302 (26%)                       | 97 (25%)   | 115 (29%)  | 90 (23%)   | 0.09    | 309 (47%)                 | 109 (50%)  | 100 (43%)  | 100 (48%)  | 0.4     |
| Congestive heart failure                              | 244 (20%)                       | 57 (14%)   | 89 (22%)   | 98 (25%)   | <0.001  | 86 (13%)                  | 20 (9%)    | 27 (12%)   | 39 (19%)   | 0.01    |
| <b>Pre-operative renal function</b>                   |                                 |            |            |            |         |                           |            |            |            |         |
| Serum creatinine                                      | 1.1 (0.3)                       | 1.0 (0.3)  | 1.1 (0.3)  | 1.1 (0.4)  | 0.003   | 1.2 (0.7)                 | 1.1 (0.4)  | 1.1 (0.5)  | 1.4 (1.1)  | <0.001  |
| ≥ 90                                                  | 129 (11%)                       | 56 (14%)   | 44 (11%)   | 29 (7%)    |         | 95 (14%)                  | 38 (17%)   | 36 (16%)   | 21 (10%)   |         |
| eGFR (ml/min per 1.73 m <sup>2</sup> )                |                                 |            |            |            |         |                           |            |            |            |         |
| 60-90                                                 | 661 (55%)                       | 226 (57%)  | 233 (59%)  | 202 (51%)  | <0.001  | 358 (54%)                 | 141 (64%)  | 117 (51%)  | 100 (48%)  | <0.001  |
| ≤ 60                                                  | 403 (34%)                       | 115 (29%)  | 121 (30%)  | 167 (42%)  |         | 207 (31%)                 | 41 (19%)   | 77 (33%)   | 89 (42%)   |         |
| <b>Characteristics of surgery and hospitalization</b> |                                 |            |            |            |         |                           |            |            |            |         |
| Elective surgery                                      | 1023 (86%)                      | 356 (90%)  | 329 (83%)  | 338 (85%)  | 0.02    | 183 (28%)                 | 63 (29%)   | 60 (26%)   | 60 (29%)   | 0.79    |
| CABG with valve repair                                | 285 (24%)                       | 95 (24%)   | 82 (21%)   | 109 (27%)  | 0.09    | 34 (5%)                   | **         | **         | **         | **      |
| CABG                                                  | 575 (48%)                       | 199 (50%)  | 209 (53%)  | 167 (42%)  |         | 577 (93%)                 | 189 (86%)  | 204 (88%)  | 184 (87%)  |         |
| Valve                                                 | 332 (28%)                       | 103 (26%)  | 107 (27%)  | 122 (31%)  |         | **                        | **         | **         | **         | **      |

| Patient characteristics             | Pre-operative gal-3 (TRIBE-AKI) |               |               |               |         | Pre-operative gal-3 (NNE) |               |               |               |         |
|-------------------------------------|---------------------------------|---------------|---------------|---------------|---------|---------------------------|---------------|---------------|---------------|---------|
|                                     | All (N=1193)                    | T1 (n=397)    | T2 (n=398)    | T3 (n=398)    | p-value | All (N=660)               | T1 (n=220)    | T2 (n=230)    | T3 (n=210)    | p-value |
| On-Pump                             | 1075 (90%)                      | 353 (89%)     | 352 (88%)     | 370 (93%)     |         | 585 (95%)                 | 191 (94%)     | 208 (94%)     | 186 (93%)     |         |
| Perfusion time (min)                | 104 (80, 140) <sup>a</sup>      | 100 (77, 131) | 102 (77, 137) | 111 (85, 145) | 0.01    | 104 (87, 122)             | 103 (83, 122) | 103 (86, 123) | 106 (90, 122) | 0.5     |
| Days hospitalized                   | 6 (5, 9)                        | 6 (5, 8)      | 6 (5, 8)      | 7 (5, 10)     | <0.001  | 8 (6, 12)                 | 8 (6, 11)     | 8 (6, 12)     | 10 (7, 14)    | 0.02    |
| Acute Kidney Injury                 | 420 (35%)                       | 122 (31%)     | 138 (35%)     | 160 (40%)     | 0.02    | 273 (41%)                 | 64 (29%)      | 87 (38%)      | 94 (45%)      | 0.003   |
| <b>Post-operative complications</b> |                                 |               |               |               |         |                           |               |               |               |         |
| Stroke                              | 7 (1%)                          | 2 (1%)        | 2 (1%)        | 3 (1%)        | 0.87    | **                        | **            | **            | **            | **      |
| Re-operation                        | 57 (5%)                         | 20 (5%)       | 15 (4%)       | 22 (6%)       | 0.47    | 26 (4%)                   | **            | **            | **            | **      |
| Prolonged Ventilation               | 39 (3%)                         | 14 (4%)       | 8 (2%)        | 17 (4%)       | 0.19    | 38 (6%)                   | **            | 17 (2%)       | 12(2%)        | **      |
| DSWI                                | 9 (1%)                          | 3 (1%)        | 3 (1%)        | 3 (1%)        | 0.9     | **                        | **            | **            | **            | **      |

**Supplemental Table 2 a-b. Characteristics of patient cohorts by pre-operative sST2 and gal-3.** Numbers are provided as n (percentage) or median (interquartile range). **a)** Tertiles are defined for sST2 as follows. For TRIBE-AKI: tertile 1 (T1) 0.08 – 3.0, tertile 2 (T2) 3.0 – 4.4, and tertile 3 (T3) 4.4 – 89.5 in ng/ml. For NNE: tertile 1 (T1) 1.1 - 3.3, tertile 2 (T2) 3.3 – 4.9, tertile 3 (T3) 4.9 – 75.0 in ng/ml. **b)** Tertiles are defined for gal-3 as follows. For TRIBE-AKI: tertile 1 (T1) 1.1 – 6.6, tertile 2 (T2) 6.6 – 10.3, tertile 3 (T3) 10.3 – 97.8 in ng/ml. For NNE: tertile 1 (T1) 1.6 – 8.7, tertile 2 (T2) 8.7 – 13.8, tertile 3 (T3) 13.8 – 102.4 in ng/ml. <sup>a</sup>Information was not available for a small number of patients (less than 50). \*\*n < 11 with inability to pull data from Medicare data server. SD = standard deviation; eGFR = estimated glomerular filtration rate; ICU = intensive care unit; DSWI = deep sternal wound infection.

**Supplemental Table 3a. Events included in the primary composite outcome.**

|                           | # (%) Events            |                  |
|---------------------------|-------------------------|------------------|
|                           | TRIBE-AKI<br>(n = 1193) | NNE<br>(n = 660) |
| Primary composite outcome | 220 (18%)               | 212 (32%)        |
| Cardiovascular event      | 122 (10%)               | 100 (15%)        |
| Death                     | 98 (8%)                 | 112 (17%)        |

**Supplemental Table 3a. Primary outcome events.** Events within each cohort are separated by component of primary outcome (CV event or death).

**Supplemental Table 3b. Hazard ratios for components of the primary outcome.**

| Post-op Biomarker (Log-transformed) | TRIBE-AKI (n=1193).<br>Hazard Ratios (95% CI)              |                   |                             |                   |                                  |                                         |
|-------------------------------------|------------------------------------------------------------|-------------------|-----------------------------|-------------------|----------------------------------|-----------------------------------------|
|                                     | Primary composite outcome: CV events or Death (222 Events) |                   | CV Events only (122 Events) |                   | Heart Failure Events (74 events) | Non-Heart Failure CV events (48 events) |
|                                     | Unadjusted                                                 | Adjusted          | Unadjusted                  | Adjusted          | Unadjusted                       | Unadjusted                              |
| sST2                                | 1.39 (1.23, 1.56)                                          | 1.31 (1.14, 1.50) | 1.32 (1.12, 1.56)           | 1.21 (1.00, 1.46) | 1.47 (1.18, 1.83)                | 0.91 (0.63, 1.32)                       |
| Gal-3                               | 1.37 (1.11, 1.68)                                          | 1.22 (0.99, 1.51) | 1.28 (0.98, 1.68)           | 1.13 (0.86, 1.49) | 2.27 (1.48, 3.48)                | 0.76 (0.50, 1.15)                       |

Due to low event rates we did not complete analyses on each type of CV events. CV events were categorized as Heart Failure events or Non-Heart Failure events. Non-Heart Failure CV events include: myocardial infarction (26 events), revascularization or coronary syndrome (22 events). Adjusted analyses were not completed due to low event rates.

**Supplemental Table 3b. Hazard ratios for components of the primary outcome.** Associations of post-operative biomarkers with separate components of the primary outcome (CV event or death).



**Supplemental Figure 2 a-b Biomarker trends for pre and post-operative sST2 and Gal-3**

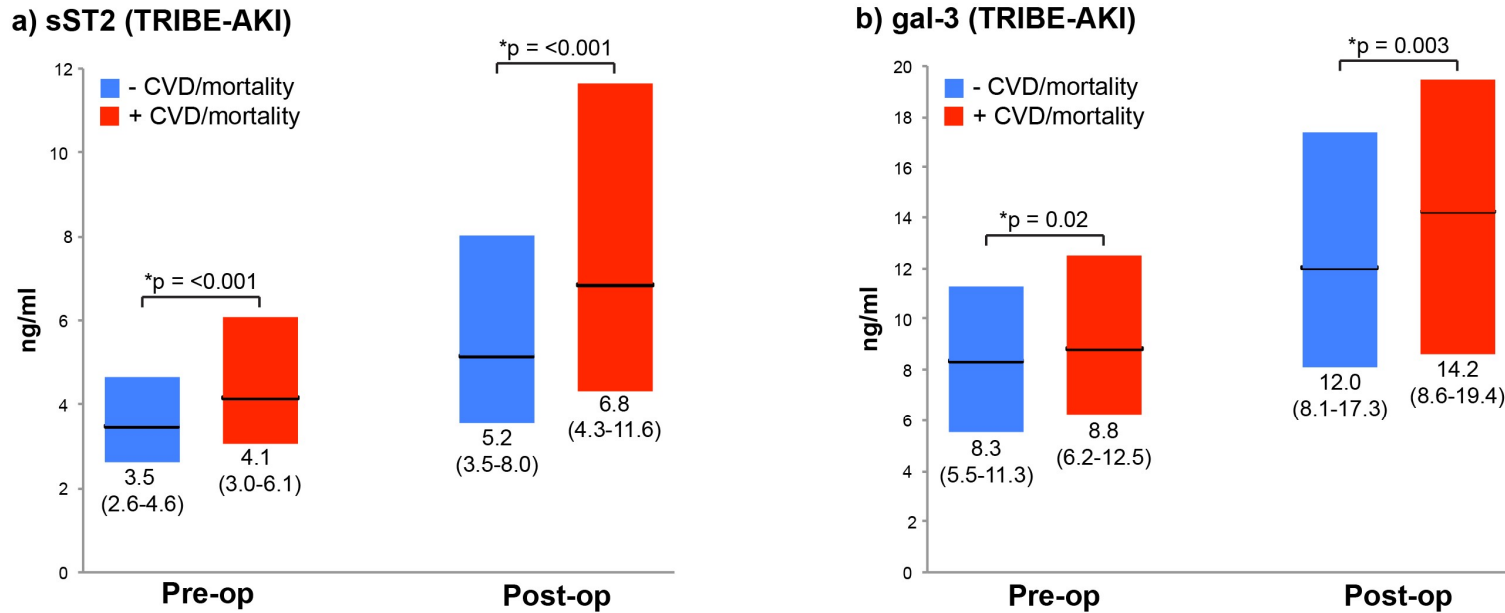

**Supplemental Figure 2 a-b. Biomarker trends for pre- and post-operative (a) sST2 and (b) gal-3 for the TRIBE-AKI cohort.** Data demonstrates median values with 25<sup>th</sup> – 75<sup>th</sup> percentiles. **(a)** Higher sST2 levels were associated with incidence of the primary outcome in pre-operative ( $p < 0.001$ ) and post-operative ( $p < 0.001$ ) stages. **(b)** Higher gal-3 levels were associated with incidence of the primary outcome in pre-operative ( $p = 0.020$ ) and post-operative ( $p = 0.003$ ) stages. N = 1193.

**Supplemental Table 4. Hazard ratios for the primary outcome after adjustment for NT-proBNP and troponin T.**

| Biomarker |         |     | Hazard Ratio (95% CI) of cardiovascular event or mortality |                         |                                   |                                    |                                                  |
|-----------|---------|-----|------------------------------------------------------------|-------------------------|-----------------------------------|------------------------------------|--------------------------------------------------|
|           |         |     | TRIBE-AKI                                                  |                         |                                   |                                    |                                                  |
|           |         |     | Event rate per 1000py                                      | Unadjusted              | Adjusted <sup>a</sup> + NT-proBNP | Adjusted <sup>a</sup> + troponin T | Adjusted <sup>a</sup> + NT-proBNP and troponin T |
| sST2      | Pre-op  | Log |                                                            | 1.85 (1.52, 2.25)       | 1.40 (1.12, 1.76)                 | 1.53 (1.22, 1.92)                  | 1.35 (1.07, 1.71)                                |
|           |         | T1  | 48.5                                                       | 1.0 ( <i>referent</i> ) | 1.0 ( <i>referent</i> )           | 1.0 ( <i>referent</i> )            | 1.0 ( <i>referent</i> )                          |
|           |         | T2  | 64.8                                                       | 1.31 (0.95, 1.82)       | 1.46 (1.03, 2.09)                 | 1.42 (0.99, 2.02)                  | 1.40 (0.98, 2.01)                                |
|           |         | T3  | 100.2                                                      | 2.00 (1.48, 2.70)       | 1.71 (1.22, 2.41)                 | 1.72 (1.22, 2.43)                  | 1.57 (1.11, 2.22)                                |
|           | Post-op | Log |                                                            | 1.39 (1.23, 1.56)       | 1.14 (0.98, 1.33)                 | 1.24 (1.07, 1.43)                  | 1.14 (0.97, 1.33)                                |
|           |         | T1  | 47.0                                                       | 1.0 ( <i>referent</i> ) | 1.0 ( <i>referent</i> )           | 1.0 ( <i>referent</i> )            | 1.0 ( <i>referent</i> )                          |
|           |         | T2  | 62.0                                                       | 1.31 (0.94, 1.83)       | 1.32 (0.93, 1.88)                 | 1.39 (0.97, 1.98)                  | 1.34 (0.94, 1.91)                                |
|           |         | T3  | 104.2                                                      | 2.18 (1.61, 2.95)       | 1.74 (1.22, 2.49)                 | 1.93 (1.36, 2.76)                  | 1.74 (1.22, 2.49)                                |
| Gal-3     | Pre-op  | Log |                                                            | 1.24 (1.01, 1.53)       | 1.14 (0.92, 1.42)                 | 1.07 (0.87, 1.33)                  | 1.12 (0.90, 1.39)                                |
|           |         | T1  | 59.4                                                       | 1.0 ( <i>referent</i> ) | 1.0 ( <i>referent</i> )           | 1.0 ( <i>referent</i> )            | 1.0 ( <i>referent</i> )                          |
|           |         | T2  | 69.1                                                       | 1.17 (0.87, 1.59)       | 1.09 (0.79, 1.52)                 | 1.13 (0.82, 1.57)                  | 1.11 (0.80, 1.55)                                |
|           |         | T3  | 82.7                                                       | 1.39 (1.03, 1.87)       | 1.21 (0.87, 1.67)                 | 1.07 (0.77, 1.49)                  | 1.13 (0.81, 1.56)                                |
|           | Post-op | Log |                                                            | 1.37 (1.11, 1.68)       | 1.21 (0.96, 1.52)                 | 1.22 (0.97, 1.54)                  | 1.20 (0.95, 1.51)                                |
|           |         | T1  | 55.7                                                       | 1.0 ( <i>referent</i> ) | 1.0 ( <i>referent</i> )           | 1.0 ( <i>referent</i> )            | 1.0 ( <i>referent</i> )                          |
|           |         | T2  | 66.2                                                       | 1.19 (0.87, 1.63)       | 1.10 (0.78, 1.55)                 | 1.11 (0.79, 1.55)                  | 1.09 (0.78, 1.54)                                |
|           |         | T3  | 90.2                                                       | 1.61 (1.20, 2.16)       | 1.42 (1.02, 1.99)                 | 1.45 (1.04, 2.02)                  | 1.38 (0.99, 1.93)                                |

**Supplemental Table 4. Hazard ratios for the primary outcome after adjustment for NT-proBNP and troponin T.** NT-proBNP and troponin T values were not available for the NNE cohort. Data was adjusted for clinical covariates, covariates with NT-proBNP or troponin T, or covariates with both NT-proBNP and troponin T. Definitions of tertiles with n for each tertile are as listed in Table 1 and Table 2. <sup>a</sup>Adjusted model included Society of Thoracic Surgery (STS) score, sex, cardiopulmonary bypass time, non-elective surgery, hypertension, and congestive heart failure.

**Supplemental Table 5. Interaction values of the primary composite outcome with incidence of CHF.**

| Biomarker |         |    | Unadjusted Hazard Ratio (95% CI) of cardiovascular event or mortality |                         |                     |                         |                         |                     |
|-----------|---------|----|-----------------------------------------------------------------------|-------------------------|---------------------|-------------------------|-------------------------|---------------------|
|           |         |    | TRIBE-AKI                                                             |                         |                     | NNE                     |                         |                     |
|           |         |    | - CHF                                                                 | + CHF                   | Interaction p-value | - CHF                   | + CHF                   | Interaction p-value |
| sST2      | Pre-op  | T1 | 1.0 ( <i>referent</i> )                                               | 1.0 ( <i>referent</i> ) | 0.9                 | 1.0 ( <i>referent</i> ) | 1.0 ( <i>referent</i> ) | 0.2                 |
|           |         | T2 | 1.30 (0.88, 1.92)                                                     | 1.51 (0.83, 2.73)       |                     | 1.34 (0.95, 1.89)       | 1.32 (0.89, 1.94)       |                     |
|           |         | T3 | 1.84 (1.27, 2.66)                                                     | 2.15 (1.27, 3.63)       |                     | 1.49 (1.06, 2.10)       | 1.46 (0.98, 2.17)       |                     |
|           | Post-op | T1 | 1.0 ( <i>referent</i> )                                               | 1.0 ( <i>referent</i> ) | 0.5                 | 1.0 ( <i>referent</i> ) | 1.0 ( <i>referent</i> ) | 0.4                 |
|           |         | T2 | 1.40 (0.95, 2.05)                                                     | 1.11 (0.56, 2.20)       |                     | 1.01 (0.70, 1.45)       | 1.05 (0.70, 1.58)       |                     |
|           |         | T3 | 1.84 (1.26, 2.67)                                                     | 2.18 (1.26, 3.80)       |                     | 1.74 (1.26, 2.41)       | 1.75 (1.20, 2.56)       |                     |
| Gal-3     | Pre-op  | T1 | 1.0 ( <i>referent</i> )                                               | 1.0 ( <i>referent</i> ) | 0.04                | 1.0 ( <i>referent</i> ) | 1.0 ( <i>referent</i> ) | 0.01                |
|           |         | T2 | 0.89 (0.61, 1.30)                                                     | 1.62 (0.92, 2.86)       |                     | 1.62 (1.14, 2.30)       | 1.77 (1.18, 2.67)       |                     |
|           |         | T3 | 1.36 (0.96, 1.92)                                                     | 1.19 (0.66, 2.13)       |                     | 1.79 (1.26, 2.54)       | 2.10 (1.39, 3.16)       |                     |
|           | Post-op | T1 | 1.0 ( <i>referent</i> )                                               | 1.0 ( <i>referent</i> ) | 0.9                 | 1.0 ( <i>referent</i> ) | 1.0 ( <i>referent</i> ) | 0.05                |
|           |         | T2 | 1.21 (0.83, 1.75)                                                     | 1.09 (0.61, 1.95)       |                     | 1.22 (0.85, 1.74)       | 1.22 (0.80, 1.85)       |                     |
|           |         | T3 | 1.51 (1.05, 2.18)                                                     | 1.38 (0.82, 2.32)       |                     | 1.87 (1.34, 2.62)       | 2.03 (1.38, 2.99)       |                     |

**Supplemental Table 5. Interaction values of the primary composite outcome with incidence of CHF.** Hazard ratios for risk of the primary composite outcome with 95% confidence intervals are shown.

**Supplemental Table 6. Interaction values of the primary composite outcome with incidence of AKI.**

| Biomarker |         |    | Unadjusted Hazard Ratio (95% CI) of cardiovascular event or mortality |                         |                     |                         |                         |                     |
|-----------|---------|----|-----------------------------------------------------------------------|-------------------------|---------------------|-------------------------|-------------------------|---------------------|
|           |         |    | TRIBE-AKI                                                             |                         |                     | NNE                     |                         |                     |
|           |         |    | - AKI                                                                 | + AKI                   | Interaction p-value | - AKI                   | + AKI                   | Interaction p-value |
| sST2      | Pre-op  | T1 | 1.0 ( <i>referent</i> )                                               | 1.0 ( <i>referent</i> ) | 0.8                 | 1.0 ( <i>referent</i> ) | 1.0 ( <i>referent</i> ) | 0.8                 |
|           |         | T2 | 1.35 (0.92, 1.98)                                                     | 1.22 (0.65, 2.28)       |                     | 1.32 (0.93, 1.87)       | 1.13 (0.72, 1.79)       |                     |
|           |         | T3 | 2.01 (1.40, 2.88)                                                     | 1.65 (0.94, 2.89)       |                     | 1.50 (1.06, 2.12)       | 1.32 (0.83, 2.10)       |                     |
|           | Post-op | T1 | 1.0 ( <i>referent</i> )                                               | 1.0 ( <i>referent</i> ) | 0.5                 | 1.0 ( <i>referent</i> ) | 1.0 ( <i>referent</i> ) | 0.5                 |
|           |         | T2 | 1.35 (0.93, 1.96)                                                     | 0.95 (0.46, 1.93)       |                     | 1.00 (0.70, 1.44)       | 0.80 (0.51, 1.27)       |                     |
|           |         | T3 | 2.09 (1.46, 2.98)                                                     | 1.35 (0.73, 2.50)       |                     | 1.69 (1.21, 2.34)       | 1.31 (0.84, 2.05)       |                     |
| Gal-3     | Pre-op  | T1 | 1.0 ( <i>referent</i> )                                               | 1.0 ( <i>referent</i> ) | 0.03                | 1.0 ( <i>referent</i> ) | 1.0 ( <i>referent</i> ) | 0.1                 |
|           |         | T2 | 1.41 (0.99, 2.01)                                                     | 0.57 (0.31, 1.04)       |                     | 1.56 (1.10, 2.23)       | 1.97 (1.22, 3.17)       |                     |
|           |         | T3 | 1.38 (0.96, 1.98)                                                     | 1.06 (0.63, 1.80)       |                     | 1.80 (1.26, 2.55)       | 2.14 (1.30, 3.51)       |                     |
|           | Post-op | T1 | 1.0 ( <i>referent</i> )                                               | 1.0 ( <i>referent</i> ) | 0.1                 | 1.0 ( <i>referent</i> ) | 1.0 ( <i>referent</i> ) | 0.3                 |
|           |         | T2 | 1.29 (0.91, 1.84)                                                     | 0.71 (0.36, 1.40)       |                     | 1.22 (0.85, 1.76)       | 1.47 (0.92, 2.34)       |                     |
|           |         | T3 | 1.37 (0.96, 1.96)                                                     | 1.47 (0.83, 2.61)       |                     | 1.90 (1.35, 2.67)       | 1.97 (1.22, 3.18)       |                     |

**Supplemental Table 6. Interaction values of the primary composite outcome with incidence of AKI.** Hazard ratios for risk of the primary composite outcome with 95% confidence intervals are shown.
